# Supplementary material for: Zhenruite, (MoO 3 ) 2 ⋅ H 2 O, and tianhuixinite, (MoO 3 ) 3 ⋅ H 2 O, two new minerals in the MoO 3 –MoO 3 ⋅ 2H 2 O system
Source: Copernicus journal article supplement (doi:10.5194/ejm-38-39-2026), 2026-01-15

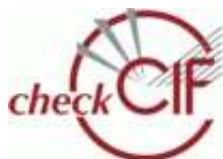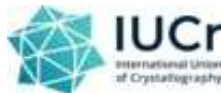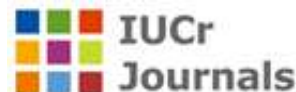

## checkCIF/PLATON report

Structure factors have been supplied for datablock(s) tianhuixinite

THIS REPORT IS FOR GUIDANCE ONLY. IF USED AS PART OF A REVIEW PROCEDURE FOR PUBLICATION, IT SHOULD NOT REPLACE THE EXPERTISE OF AN EXPERIENCED CRYSTALLOGRAPHIC REFEREE.

No syntax errors found.      CIF dictionary      Interpreting this report

### Datablock: tianhuixinite

---

|                 |                  |                      |                    |
|-----------------|------------------|----------------------|--------------------|
| Bond precision: | Mo- O = 0.0102 Å |                      | Wavelength=1.54184 |
| Cell:           | a=10.5963(12)    | b=10.5963(12)        | c=3.7216(4)        |
|                 | alpha=90         | beta=90              | gamma=120          |
| Temperature:    | 293 K            |                      |                    |
|                 | Calculated       | Reported             |                    |
| Volume          | 361.88(9)        | 361.88(9)            |                    |
| Space group     | P 63/m           | P 63/m               |                    |
| Hall group      | -P 6c            | -P 6c                |                    |
| Moiety formula  | Mo6 O18, 2(O)    | 0.25(Mo12 O36), 1(O) |                    |
| Sum formula     | Mo6 O20          | Mo3 O10              |                    |
| Mr              | 895.64           | 447.82               |                    |
| Dx, g cm-3      | 4.110            | 4.110                |                    |
| Z               | 1                | 2                    |                    |
| Mu (mm-1)       | 42.467           | 42.467               |                    |
| F000            | 412.0            | 412.0                |                    |
| F000'           | 412.77           |                      |                    |
| h, k, lmax      | 13, 13, 4        | 13, 13, 4            |                    |
| Nref            | 309              | 296                  |                    |
| Tmin, Tmax      | 0.698, 0.809     | 0.367, 1.000         |                    |
| Tmin'           | 0.623            |                      |                    |

Correction method= # Reported T Limits: Tmin=0.367 Tmax=1.000  
AbsCorr = MULTI-SCAN

Data completeness= 0.958

Theta(max)= 78.771

R(reflections)= 0.0606( 269)

wR2(reflections)=  
0.1780( 296)

S = 1.138

Npar= 26

---

The following ALERTS were generated. Each ALERT has the format

**test-name\_ALERT\_alert-type\_alert-level.**

Click on the hyperlinks for more details of the test.

---

### Alert level A

|                   |                                          |    |           |
|-------------------|------------------------------------------|----|-----------|
| PLAT973_ALERT_2_A | Check Calcd Positive Resid. Density on   | Mo | 3.10 eA-3 |
| PLAT975_ALERT_2_A | Check Calcd Resid. Dens. 0.93Ang From O4 | .  | 2.03 eA-3 |

---

### Alert level B

|                   |                                                |    |       |
|-------------------|------------------------------------------------|----|-------|
| PLAT306_ALERT_2_B | Isolated Oxygen Atom (H-atoms Missing ?) ..... | O4 | Check |
|-------------------|------------------------------------------------|----|-------|

---

### Alert level C

DIFMX02\_ALERT\_1\_C The maximum difference density is > 0.1\*ZMAX\*0.75  
The relevant atom site should be identified.

|                   |                                              |        |       |
|-------------------|----------------------------------------------|--------|-------|
| PLAT041_ALERT_1_C | Calc. and Reported SumFormula Strings Differ | Please | Check |
|                   | Calc.: Mo6 O20                               |        |       |
|                   | Rep.: Mo3 O10                                |        |       |

|                   |                                                 |        |       |
|-------------------|-------------------------------------------------|--------|-------|
| PLAT042_ALERT_1_C | Calc. and Reported MoietyFormula Strings Differ | Please | Check |
|                   | Calc.: Mo6 O18, 2(O)                            |        |       |
|                   | Rep.: 0.25(Mo12 O36), 1(O)                      |        |       |

|                   |                                                  |      |        |
|-------------------|--------------------------------------------------|------|--------|
| PLAT094_ALERT_2_C | Ratio of Maximum / Minimum Residual Density .... | 2.05 | Report |
|-------------------|--------------------------------------------------|------|--------|

|                   |                                              |   |       |
|-------------------|----------------------------------------------|---|-------|
| PLAT202_ALERT_3_C | Isotropic non-H Atoms in Anion/Solvent ..... | 1 | Check |
|                   | O4                                           |   |       |

|                   |                                                 |       |       |
|-------------------|-------------------------------------------------|-------|-------|
| PLAT906_ALERT_3_C | Large K Value in the Analysis of Variance ..... | 2.699 | Check |
|-------------------|-------------------------------------------------|-------|-------|

|                   |                                          |      |      |
|-------------------|------------------------------------------|------|------|
| PLAT971_ALERT_2_C | Check Calcd Resid. Dens. 0.93Ang From O4 | 2.03 | eA-3 |
|-------------------|------------------------------------------|------|------|

|                   |                                          |      |      |
|-------------------|------------------------------------------|------|------|
| PLAT971_ALERT_2_C | Check Calcd Resid. Dens. 0.80Ang From O2 | 1.59 | eA-3 |
|-------------------|------------------------------------------|------|------|

|                   |                                          |      |      |
|-------------------|------------------------------------------|------|------|
| PLAT971_ALERT_2_C | Check Calcd Resid. Dens. 0.95Ang From Mo | 1.56 | eA-3 |
|-------------------|------------------------------------------|------|------|

|                   |                                          |      |      |
|-------------------|------------------------------------------|------|------|
| PLAT971_ALERT_2_C | Check Calcd Resid. Dens. 1.86Ang From O3 | 1.53 | eA-3 |
|-------------------|------------------------------------------|------|------|

|                   |                                          |   |           |
|-------------------|------------------------------------------|---|-----------|
| PLAT975_ALERT_2_C | Check Calcd Resid. Dens. 0.89Ang From O2 | . | 0.89 eA-3 |
|-------------------|------------------------------------------|---|-----------|

|                   |                                          |   |           |
|-------------------|------------------------------------------|---|-----------|
| PLAT975_ALERT_2_C | Check Calcd Resid. Dens. 0.63Ang From O2 | . | 0.75 eA-3 |
|-------------------|------------------------------------------|---|-----------|

|                   |                                          |   |           |
|-------------------|------------------------------------------|---|-----------|
| PLAT975_ALERT_2_C | Check Calcd Resid. Dens. 0.60Ang From O2 | . | 0.75 eA-3 |
|-------------------|------------------------------------------|---|-----------|

|                   |                                          |   |           |
|-------------------|------------------------------------------|---|-----------|
| PLAT975_ALERT_2_C | Check Calcd Resid. Dens. 0.88Ang From O3 | . | 0.49 eA-3 |
|-------------------|------------------------------------------|---|-----------|

|                   |                                          |   |           |
|-------------------|------------------------------------------|---|-----------|
| PLAT975_ALERT_2_C | Check Calcd Resid. Dens. 0.99Ang From O3 | . | 0.45 eA-3 |
|-------------------|------------------------------------------|---|-----------|

|                   |                                          |   |           |
|-------------------|------------------------------------------|---|-----------|
| PLAT975_ALERT_2_C | Check Calcd Resid. Dens. 0.56Ang From O1 | . | 0.43 eA-3 |
|-------------------|------------------------------------------|---|-----------|

|                   |                                          |   |            |
|-------------------|------------------------------------------|---|------------|
| PLAT976_ALERT_2_C | Check Calcd Resid. Dens. 0.82Ang From O4 | . | -0.92 eA-3 |
|-------------------|------------------------------------------|---|------------|

|                   |                                          |   |            |
|-------------------|------------------------------------------|---|------------|
| PLAT976_ALERT_2_C | Check Calcd Resid. Dens. 0.89Ang From O4 | . | -0.86 eA-3 |
|-------------------|------------------------------------------|---|------------|

|                   |                                          |   |            |
|-------------------|------------------------------------------|---|------------|
| PLAT976_ALERT_2_C | Check Calcd Resid. Dens. 1.01Ang From O1 | . | -0.65 eA-3 |
|-------------------|------------------------------------------|---|------------|

---

### Alert level G

|                   |                                                  |   |      |
|-------------------|--------------------------------------------------|---|------|
| PLAT004_ALERT_5_G | Polymeric Structure Found with Maximum Dimension | 1 | Info |
|-------------------|--------------------------------------------------|---|------|

|                   |                                                  |       |       |
|-------------------|--------------------------------------------------|-------|-------|
| PLAT045_ALERT_1_G | Calculated and Reported Z Differ by a Factor ... | 0.500 | Check |
|-------------------|--------------------------------------------------|-------|-------|

|                   |                                                |      |        |
|-------------------|------------------------------------------------|------|--------|
| PLAT072_ALERT_2_G | SHELXL First Parameter in WGHT Unusually Large | 0.12 | Report |
|-------------------|------------------------------------------------|------|--------|

|                   |                                                  |     |       |
|-------------------|--------------------------------------------------|-----|-------|
| PLAT199_ALERT_1_G | Reported _cell_measurement_temperature ..... (K) | 293 | Check |
|-------------------|--------------------------------------------------|-----|-------|

|                   |                                               |     |       |
|-------------------|-----------------------------------------------|-----|-------|
| PLAT200_ALERT_1_G | Reported _diffn_ambient_temperature ..... (K) | 293 | Check |
|-------------------|-----------------------------------------------|-----|-------|

PLAT794\_ALERT\_5\_G Tentative Bond Valency for Mo (VI) . 5.95 Info  
 PLAT883\_ALERT\_1\_G Absent Datum for \_atom\_sites\_solution\_primary .. Please Do !  
 PLAT910\_ALERT\_3\_G Missing FCF Reflection(s) Below Theta (Min) [Deg]= 9.67 Note  
                   0 1 0, -1 2 0,  
 PLAT912\_ALERT\_4\_G Missing # of FCF Reflections Above STh/L= 0.600 9 Note  
 PLAT913\_ALERT\_3\_G Missing # of Very Strong Reflections in FCF .... 1 Note  
                   0 0 2,  
 PLAT969\_ALERT\_5\_G The 'Henn et al.' R-Factor-gap value ..... 6.016 Note  
                   Predicted wR2: Based on SigI\*\*2 2.96 or SHELX Weight 15.65

- 
- 2 **ALERT level A** = Most likely a serious problem - resolve or explain  
 1 **ALERT level B** = A potentially serious problem, consider carefully  
 19 **ALERT level C** = Check. Ensure it is not caused by an omission or oversight  
 11 **ALERT level G** = General information/check it is not something unexpected
- 7 ALERT type 1 CIF construction/syntax error, inconsistent or missing data  
 18 ALERT type 2 Indicator that the structure model may be wrong or deficient  
 4 ALERT type 3 Indicator that the structure quality may be low  
 1 ALERT type 4 Improvement, methodology, query or suggestion  
 3 ALERT type 5 Informative message, check
- 

It is advisable to attempt to resolve as many as possible of the alerts in all categories. Often the minor alerts point to easily fixed oversights, errors and omissions in your CIF or refinement strategy, so attention to these fine details can be worthwhile. It is up to the individual to critically assess their own results and, if necessary, seek expert advice.

---

**PLATON version of 26/09/2025; check.def file version of 20/09/2025**

---

## duplicate check

A reduced cell check using CCDC's cellCheckCSD service has found that one or more structures in this CIF are similar to those previously published in the CSD or the ICSD.

### DATABLOCK: tianhuixinite

- ICSD number: 126845

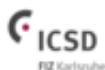

[Cell Parameters for 126845: 10.6224,10.6224,3.723(90,90,120)]

### DATABLOCK: tianhuixinite

- ICSD number: 135008

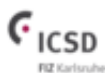

[Cell Parameters for 135008: 10.5927,10.5927,3.7241(90,90,120)]

### DATABLOCK: tianhuixinite

- ICSD number: 177615

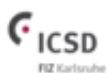

[Cell Parameters for 177615: 10.5621,10.5621,3.7184(90,90,120)]

Datablock tianhuixinite - ellipsoid plot

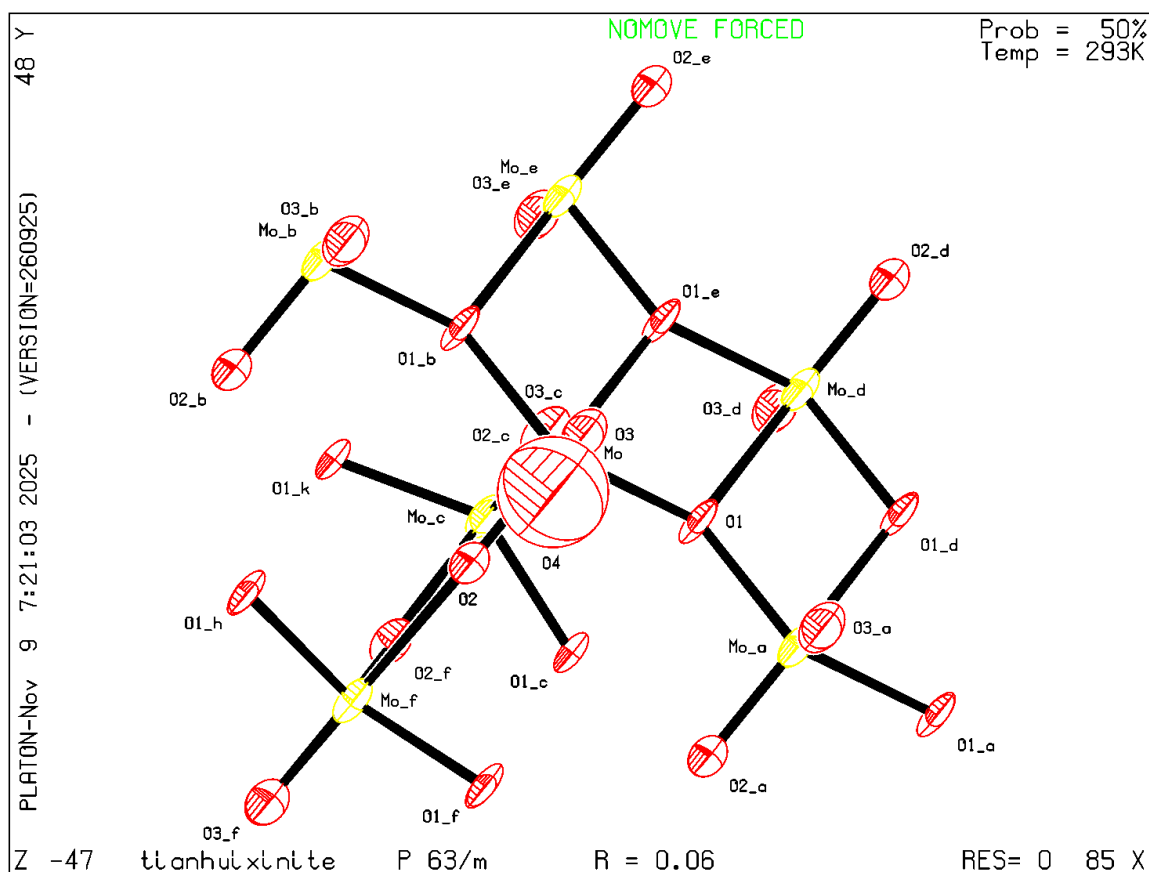

Supplement: Supplementary file 3 [file tianhuixinite-checkcif.pdf › tianhuixinite-checkcif.pdf]
