# Supplementary material for: Zhenruite, (MoO 3 ) 2 ⋅ H 2 O, and tianhuixinite, (MoO 3 ) 3 ⋅ H 2 O, two new minerals in the MoO 3 –MoO 3 ⋅ 2H 2 O system
Source: Copernicus journal article supplement (doi:10.5194/ejm-38-39-2026), 2026-01-15
Supplement: Supplementary file [file ejm-38-39-2026-supplement-title-page.pdf › ejm-38-39-2026-supplement-title-page.pdf]

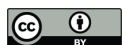

*Supplement of*

**Zhenruite,  $(\text{MoO}_3)_2 \cdot \text{H}_2\text{O}$ , and tianhuixinite,  $(\text{MoO}_3)_3 \cdot \text{H}_2\text{O}$ , two new minerals in the  $\text{MoO}_3$ – $\text{MoO}_3 \cdot 2\text{H}_2\text{O}$  system**

**Xiangping Gu et al.**

*Correspondence to:* Xiangping Gu (guxp2004@163.com)

- ejm-38-39-2026-supplement-title-page.pdf
- 2022-050\_ZHENRUIITE\_ALett.pdf
- 2022-081\_TIANHUIXINITE\_ALett.pdf
- tianhuixinite-checkcif.pdf
- tianhuixinite.cif
- zhenruite-checkcif.pdf
- zhenruite.cif

The copyright of individual parts of the supplement might differ from the article licence.
